# Supplementary material for: Heteroatom-doped hierarchical porous carbons as high-performance metal-free oxygen reduction electrocatalysts
Source: Royal Society of Chemistry journal article supplement (doi:10.1039/c5ta01611h), 2015-01-01
Supplement: c5ta01611h1.pdf [file c5ta01611h1.pdf]

## Electronic Supporting Information

### **Heteroatom-doped hierarchical porous carbons as high-performance metal-free oxygen reduction electrocatalysts**

*Yun-Pei Zhu,<sup>a</sup> Youlin Liu,<sup>a</sup> Yu-Ping Liu,<sup>a</sup> Tie-Zhen Ren,<sup>b</sup> Gao-Hui Du,<sup>c</sup> Tiehong Chen<sup>a</sup> and Zhong-Yong Yuan<sup>\*,a</sup>*

<sup>a</sup> *Key Laboratory of Advanced Energy Materials Chemistry (Ministry of Education), Collaborative Innovation Center of Chemical Science and Engineering (Tianjin), College of Chemistry, Nankai University, Tianjin 300071, China. E-mail: zyyuan@nankai.edu.cn.*

<sup>b</sup> *School of Chemical Engineering and Technology, Hebei University of Technology, Tianjin 300130, China.*

<sup>c</sup> *Institute of Physical Chemistry, Zhejiang Normal University, Jinhua 321004, China.*

# 1. Experimental

## 1.1 Materials.

1-Hydroxyethylidene-1,1-diphosphonic acid (HEDP), amino trimethylene phosphonic acid (ATMP), and ethylene diamine tetra(methylene phosphonic acid) (EDTMP) were received from Shandong Taihe Chemical Co., Ltd (**Scheme S1**). Methylene diphosphonic acid (MDA), 1,5-naphthalenedisulfonic acid tetrahydrate (1,5-NDA), ethanedisulfonic acid (EDS), 1,3,5-tris(4-carboxyphenyl)benzene (H<sub>3</sub>BTB), 2,6-Naphthalenedicarboxylic acid (H<sub>2</sub>NDC), were obtained from Sigma-Aldrich Chemical Co (**Scheme S1**). Melamine, dicyandiamide, urea, and boric acid were purchased from Tianjin Guangfu Chemical. All chemicals were used as received without further purification.

## 1.2 Material preparation.

**N,P co-doped porous graphitized carbons (NP-HPC).** No templates or surfactants were involved in the entire synthesis. Typically, 6 mmol HEDP and 10 mmol melamine were homogeneously mixed in 50 mL deionized water under vigorous stirring, followed by evaporating the water at 115 °C. Then, the white samples were further dried at 80 °C under vacuum conditions for 6h, followed by calcining at 900 °C for 3h. The ultimate black carbonaceous materials were names as NP-HPC. **N,S co-doped (NS-HPC)** and **N doped (N-HPC)** porous carbons were synthesized in a similar way to NP-HPC, where the sulfonic and carboxylic acids replaced phosphonic acids, respectively.

## 1.3 Physicochemical characterization.

Scanning electron microscopy (SEM) was carried out on a Jeol JSF-7500L microscope at 5 kV. Transmission electron microscopy (TEM) was carried out on a Jeol JEM 2100F microscope at 200 kV. All samples subjected to TEM measurements were ultrasonically dispersed in ethanol and dropcast onto copper grids covered with a carbon film. Atomic force microscopy (AFM) images were obtained using an SPA-400 atomic force microscope. These probes have a fundamental resonance frequency between 250 and 400 kHz, nominal spring constant of 42 N m<sup>-1</sup> and nominal tip radius of 10 nm. All images represent flattened data using the NanoScope Analysis version 1.20 software packages. Raman spectra were obtained on Thermo-Fisher Scientific DXR spectrometer

with 532 nm wavelength incident laser light. N<sub>2</sub> adsorption–desorption isotherms were measured on a BELSORP-mini II sorption analyzer at liquid nitrogen temperature (77 K). Prior to measurement, the samples were degassed at 200 °C overnight. Surface areas were calculated by the multi-point Brunauer–Emmett–Teller (BET) method; total pore volumes were estimated from the volume adsorbed at a relative pressure ( $P/P_0$ ) of 0.99; the pore-size distribution was calculated from the adsorption branch using the Barrett–Joyner–Halenda (BJH) method. Fourier transform infrared (FT-IR) spectra were measured on a Bruker VECTOR 22 spectrometer with KBr pellet technique, and the ranges of spectrograms were 4000 to 400 cm<sup>-1</sup>. X-ray diffraction (XRD) patterns were recorded on a Bruker D8 Focus Diffractometer with Cu-K<sub>α</sub> radiation ( $\lambda = 0.15418$  nm) operated at 40 kV and 40 mA. X-ray photoelectron spectroscopy (XPS) measurements were performed on a Kratos Axis Ultra DLD (delay line detector) spectrometer equipped with a monochromatic Al-K<sub>α</sub> X-ray source (1486.6 eV). All XPS spectra were recorded using an aperture slot of 300 × 700 microns, survey spectra were recorded with a pass energy of 160 eV and high resolution spectra with a pass energy of 40 eV. Thermogravimetry analysis (TGA) was performed using a TA SDT Q600 instrument at a heating rate of 10 °C min<sup>-1</sup> using  $\alpha$ -Al<sub>2</sub>O<sub>3</sub> as the reference.

#### **1.4 Electrode preparation and electrocatalytic activity evolution.**

In order to prepare the working electrode, 4 mg of NPMC samples were dispersed in an aqueous solution containing 0.5 mL Mill-Q water and 0.5 mL isopropanol under sonication. The glass carbon (GC) electrode (5 mm in diameter) was firstly polished with 0.5  $\mu$ m down to 0.05  $\mu$ m alumina powder, washed with Mill-Q water and ethanol and allowed to dry. 10  $\mu$ L of the obtained homogeneous catalyst ink was dropped onto the mirror polished glassy carbon electrode. Following overnight solvent evaporation in air, a thin layer of Nafion® solution was coated onto the electrode surface and then dried in air for 1 h; the resulting electrode served as a working electrode. All the electrochemical measurements were conducted in a three-electrode configuration. Ag/AgCl was used as the reference electrode and the counter electrode was platinum wire. Pt/C (20 wt%, Alfa Aesar) electrode was prepared by using the same procedure. Electrochemical experiments were conducted at room temperature on a CHI660D electrochemical workstation (CH instrument Co. USA).

A flow of O<sub>2</sub> was maintained over the electrolyte (0.1 M KOH) during the recording of

electrochemical measurements in order to ensure its continued O<sub>2</sub> saturation. Cyclic voltammograms (CVs) and linear sweep voltammograms (LSVs) were carried out using a glassy carbon RDE. The scan rate of CVs was kept as 20 mV s<sup>-1</sup> while that for LSVs was 10 mV s<sup>-1</sup>. All the electrochemical data were recorded after contiguous CV cyclic scans at a rate of 20 mV s<sup>-1</sup> for at least 20 times. On the basis of RDE data, the overall electron transfer number per oxygen molecule involved in oxygen reduction can be determined by Koutechy-Levich (K-L) equation:<sup>[S1,S2]</sup>

$$1/J = 1/J_k + 1/J_L = 1/J_k + 1/B\omega^{1/2} \quad (1)$$

where  $J_k$  is the kinetic current and  $\omega$  is the electrode rotating rate.  $B$  is determined from the slope of the K-L plots based on the Levich equation as given below:

$$B = 0.2nF(D_{O_2})^{2/3}\nu^{-1/6}C_{O_2} \quad (2)$$

where  $n$  represents the transferred electron number per oxygen molecule.  $F$  is Faraday constant ( $F = 96485 \text{ C mol}^{-1}$ ).  $D_{O_2}$  is the diffusion coefficient of O<sub>2</sub> in 0.1 M KOH ( $D_{O_2} = 1.9 \times 10^{-5} \text{ cm}^2 \text{ s}^{-1}$ ).  $\nu$  is the kinetic viscosity ( $\nu = 0.01 \text{ cm}^2 \text{ s}^{-1}$ ).  $C_{O_2}$  is the bulk concentration of O<sub>2</sub> ( $C_{O_2} = 1.2 \times 10^{-6} \text{ mol cm}^{-3}$ ). The constant 0.2 is adopted when the rotation speed is expressed in rpm. For the Tafel plot, the kinetic current was calculated from the mass-transport correction of RDE using the following equation:

$$J_k = J \times J_L / (J_L - J) \quad (3)$$

## 2. Supplementary figures

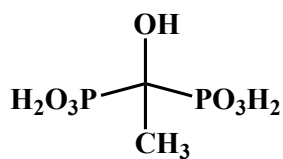

**HEDP**

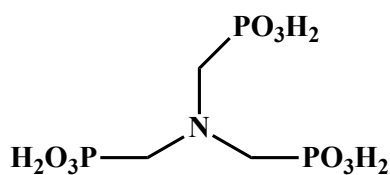

**ATMP**

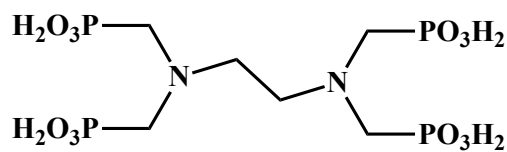

**EDTMP**

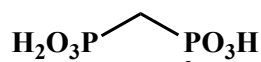

**MDP**

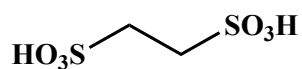

**EDS**

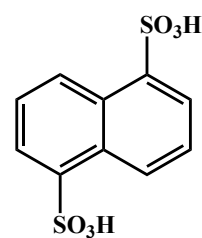

**1,5-NDA**

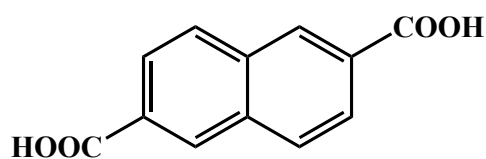

**H<sub>2</sub>NDC**

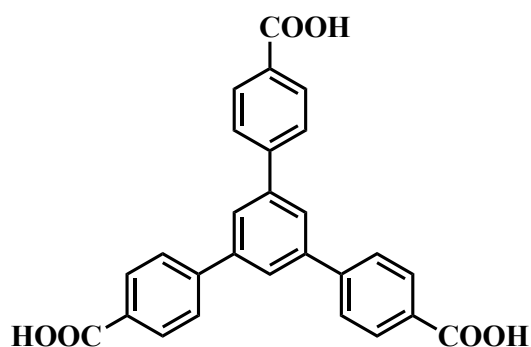

**H<sub>3</sub>BTB**

**Scheme S1.** Structural formulas of the used phosphonic, sulfonic, and carboxylic acids.

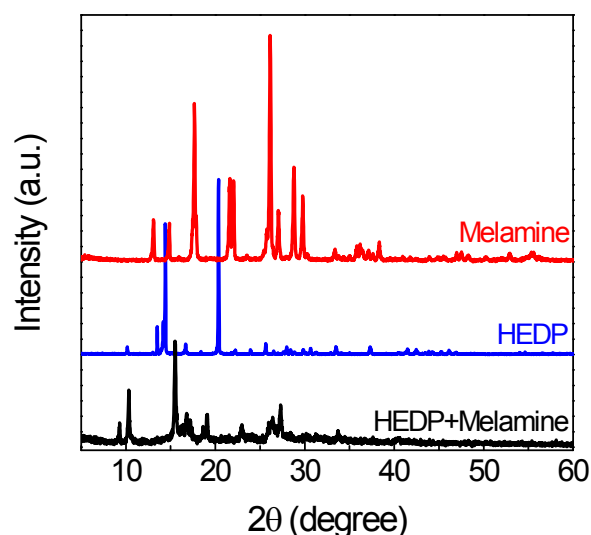

**Fig. S1** XRD patterns of melamine, HEDP, and the corresponding mixtures (HEDP+Melamine).

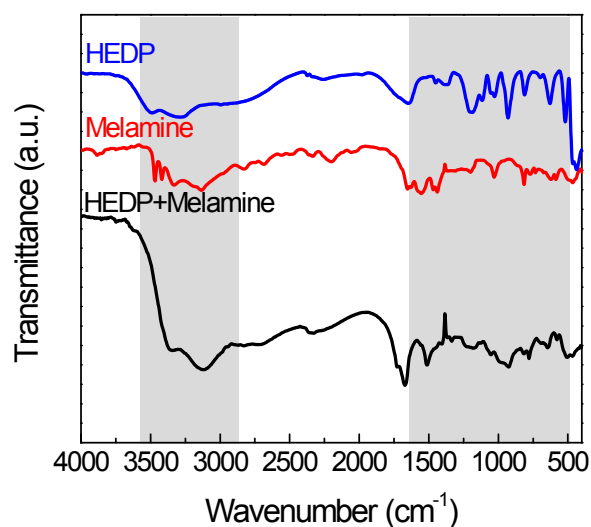

**Fig. S2** FT-IR spectra patterns of melamine, HEDP, and the corresponding mixtures. The gray areas present the vibration bands of typical HEDP and melamine. For HEDP, the sharp band around 930 cm<sup>-1</sup> is related to P–OH and the shoulder band at about 1450 cm<sup>-1</sup> is corresponded to P–C stretching vibration.<sup>S3</sup> As to melamine, the bands around 3450 cm<sup>-1</sup> are assigned to –NH<sub>2</sub><sup>S4</sup> and the band at 820 cm<sup>-1</sup> is related to stretching vibrations of triazine ring<sup>S5</sup>. With respect to the polymer form HEDP and melamine (HEDP + Melamine), the bands attributed to P–OH and –NH<sub>2</sub> weaken or disappear, which accompanies by the preservation of typical P–C band and vibrations of triazine ring, implying the formation of polymers via acid-base interaction.

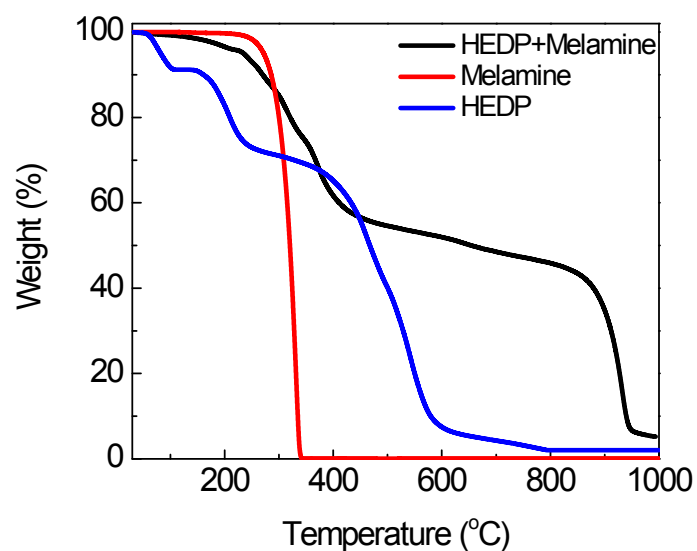

**Fig. S3** TGA curves of melamine, HEDP, and the corresponding mixtures. For the polymer, the weight loss from room temperature to 180 °C is due to the desorption of water molecules. The second stage in the range of 180–600 °C is attributed to the decomposition of organics, and the last weight loss above 600 °C can be related to deep carbonization process and loss of volatiles.

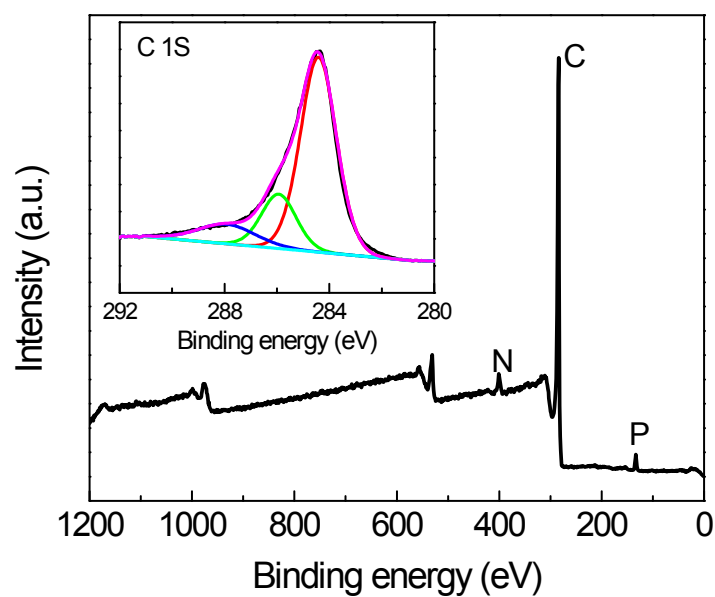

**Figure S4.** XPS survey and high-resolution spectra of C 1s core levels in NC-HPC.

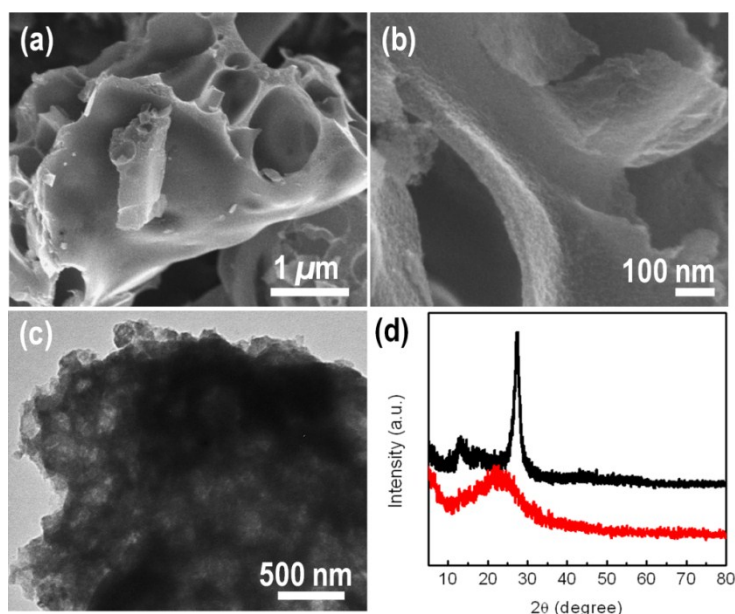

**Fig. S5** SEM (a, b) and TEM (c) images of the carbonaceous materials obtained by calcination of the HEDP-melamine induced polymers at 550 °C for 4 h (denoted as NP-PC-550). (d) Power XRD patterns of the NP-PC-500-4 (red solid line) and graphitic carbon nitride ( $\text{g-C}_3\text{N}_4$ , black solid line). Fig. S5a-c show the formation of porosity and thick layers. It should be noted that calcination of single melamine at 550 °C for 4h leads to the formation of  $\text{g-C}_3\text{N}_4$ , showing two characteristic peaks at  $2\theta = 13.8^\circ$  and  $27.3^\circ$ .<sup>S6</sup> However, NP-PC-550 exhibit no typical diffractions attributable to  $\text{g-C}_3\text{N}_4$ , indicating that the intimate interaction between acid and base units generates stable polymer and the pyrolysis and carbonization processes occur during the increase of temperature.

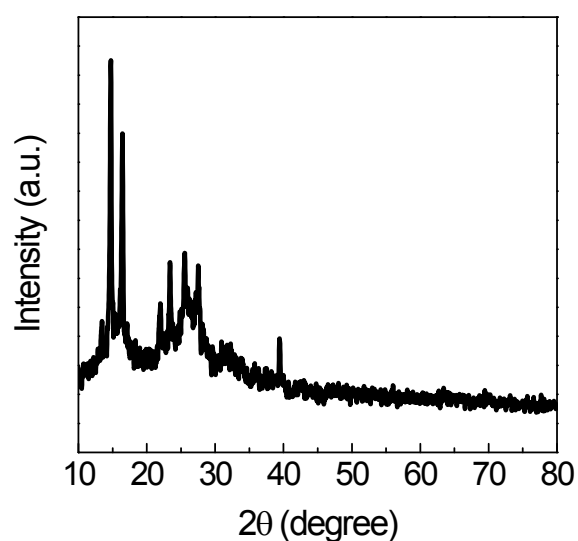

**Fig. S6** XRD pattern of the yellow-red solid deposited on the furnace walls, which could be assigned to elemental phosphorus.



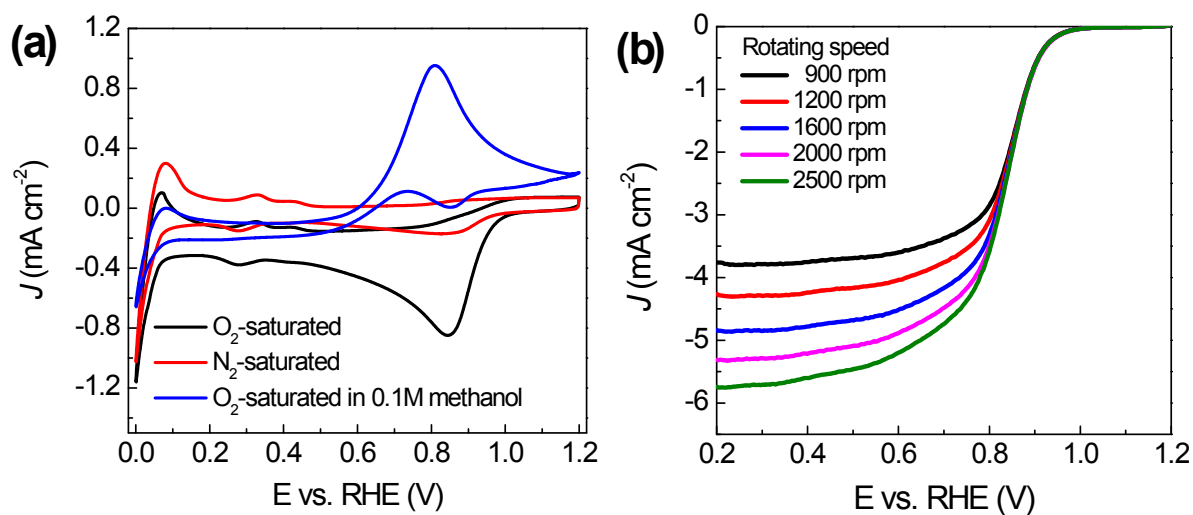

**Fig. S7** (a) CV curves of commercial Pt/C in  $\text{N}_2$ -saturated 0.1 M KOH,  $\text{O}_2$ -saturated 0.1 M KOH, and  $\text{O}_2$ -saturated 1 M methanol solutions. Scan rate:  $20 \text{ mV s}^{-1}$ . (b) ORR polarization curves of Pt/C at different rotating speeds.

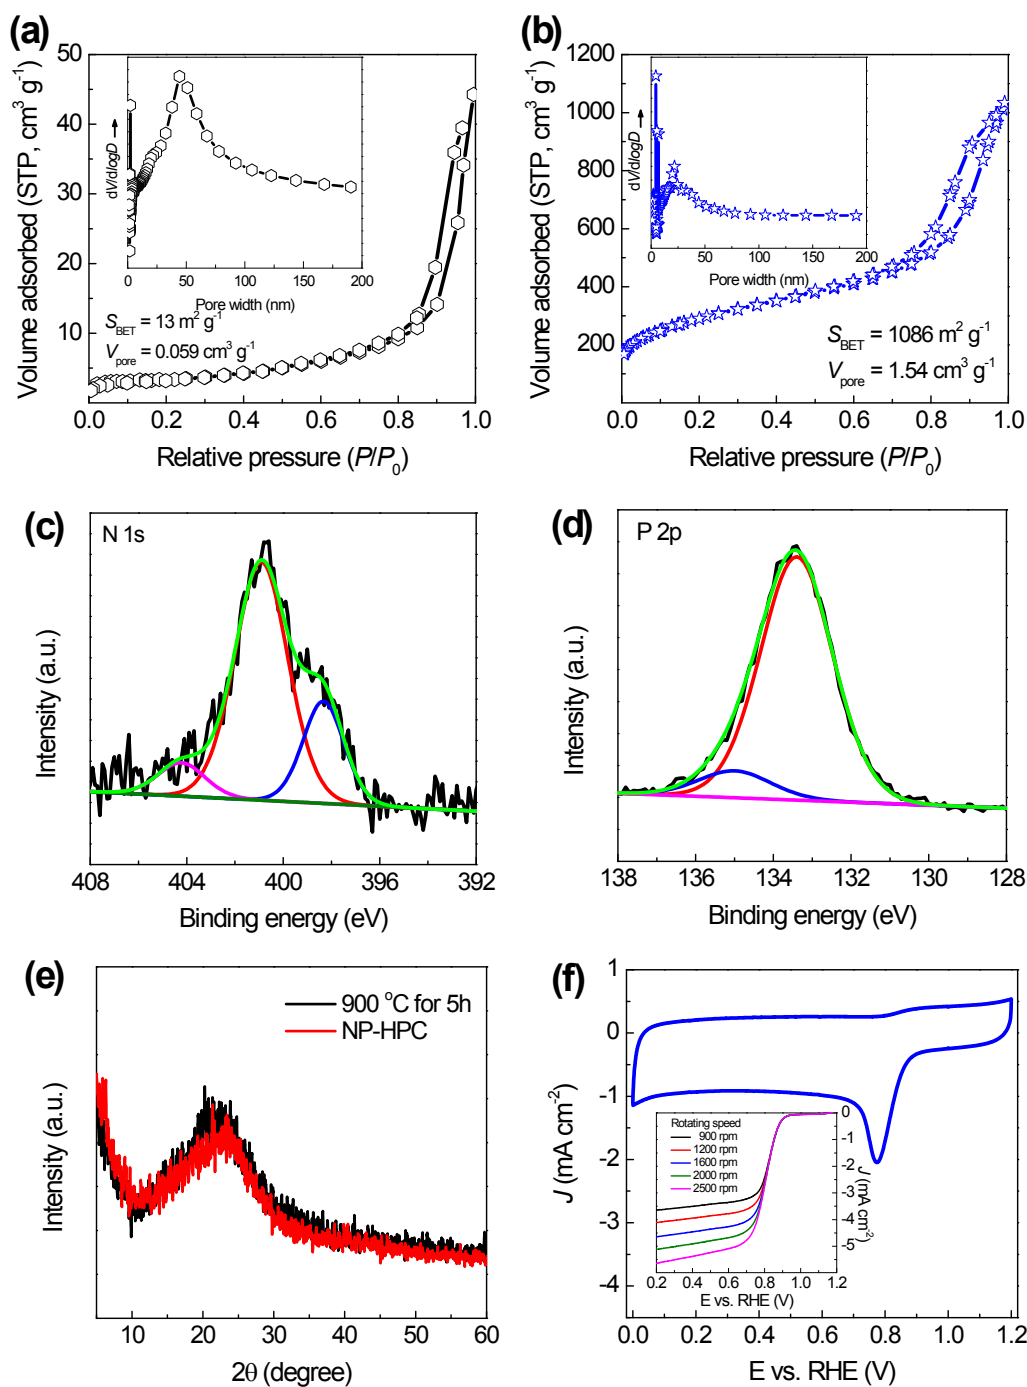

**Fig. S8** N<sub>2</sub> sorption isotherm of the samples prepared via calcining at 800 °C for 3h (a) and 900 °C for 5h (b), respectively. Inset: pore size distribution curves. (c, d) High-resolution N 1s and P 2p XPS spectra in the sample via calcining at 900 °C for 5h. (e) Comparison of the XRD patterns. (f) the corresponding CV curve in O<sub>2</sub>-saturated 0.1 M KOH at a sweep rate of 20 mV s<sup>-1</sup>. Inset: ORR polarization curves at different rotating speeds at a sweep rate of 10 mV s<sup>-1</sup>. The N and P atomic content based on XPS are determined to be 1.84 and 1.49 at%, respectively. The increased intensity of XRD diffraction peak reveals the increase of graphitization degree. The lower surface area and heteroatom contents can be related to increased graphitic and stacking degree.

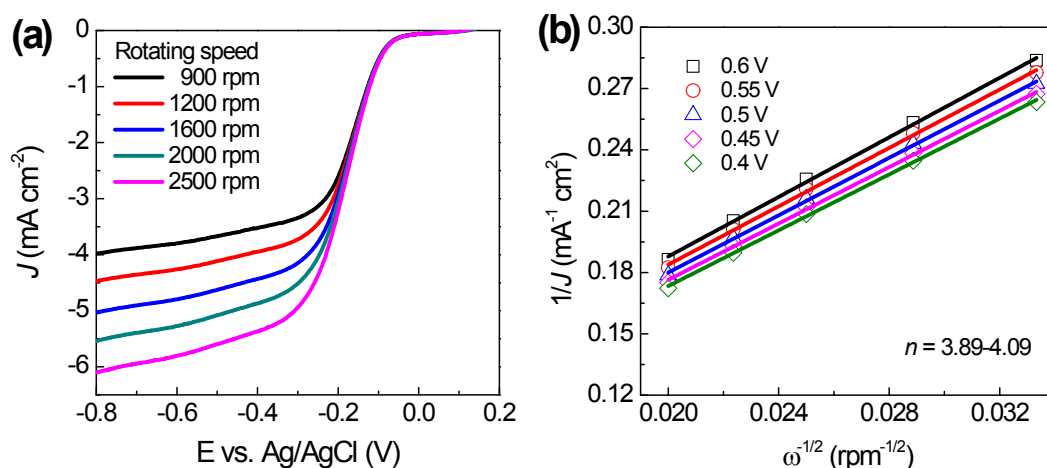

**Fig. S9** (a) ORR polarization curves of NP-HPC at different rotating speeds in an O<sub>2</sub>-saturated 0.1 M KOH aqueous solution. (b) The corresponding K-L plots at various potentials, indicating the pseudo-four-electron ORR process in a wide potential range.

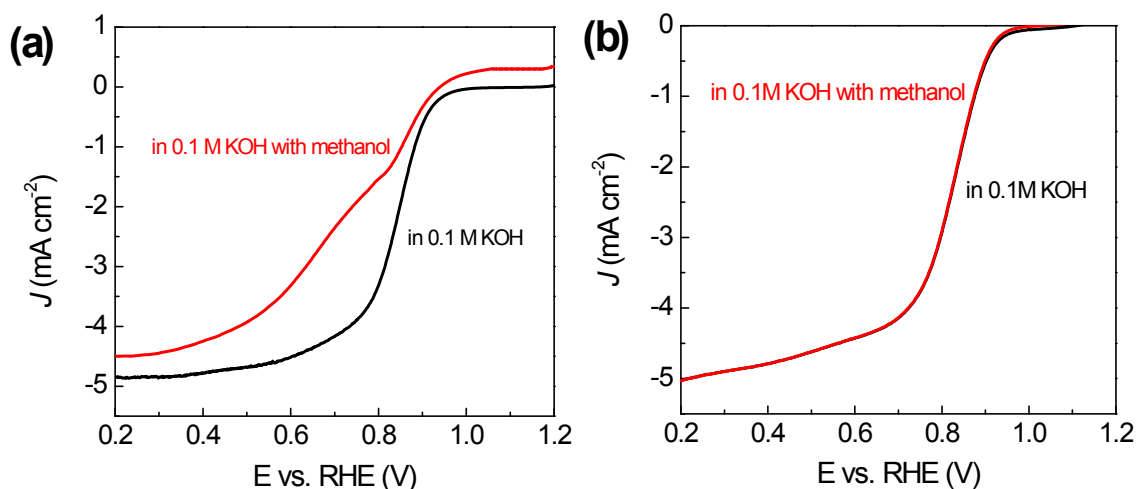

**Fig. S10** Linear sweep voltammograms on RDE for (a) Pt/C electrode and (b) NP-HPC electrode in O<sub>2</sub>-saturated 0.1 M KOH and with 1 M methanol at a rotating speed of 1600 rpm. The ORR curve for Pt/C electrode shows a weak oxidation peak between 0.8 V in the presence of methanol, which could be ascribed to the oxidation of methanol. In addition, Pt/C electrode shows a negative on-set potential shift for ORR with the addition of methanol. On the contrary, no significant difference and/or changes of the ORR curves can be detected for the NP-HPC electrocatalyst in the presence of methanol.

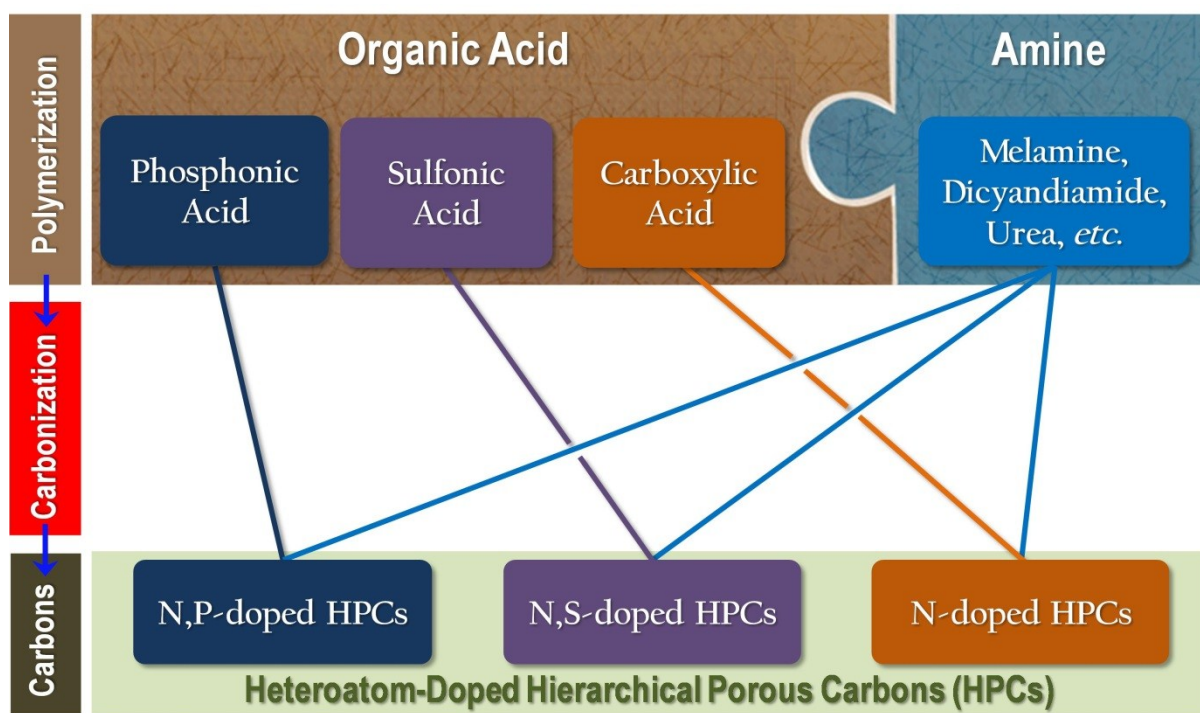

**Fig. S11** General scheme of the acid-amine polymerization-carbonization strategy for heteroatom-doped HPCs.

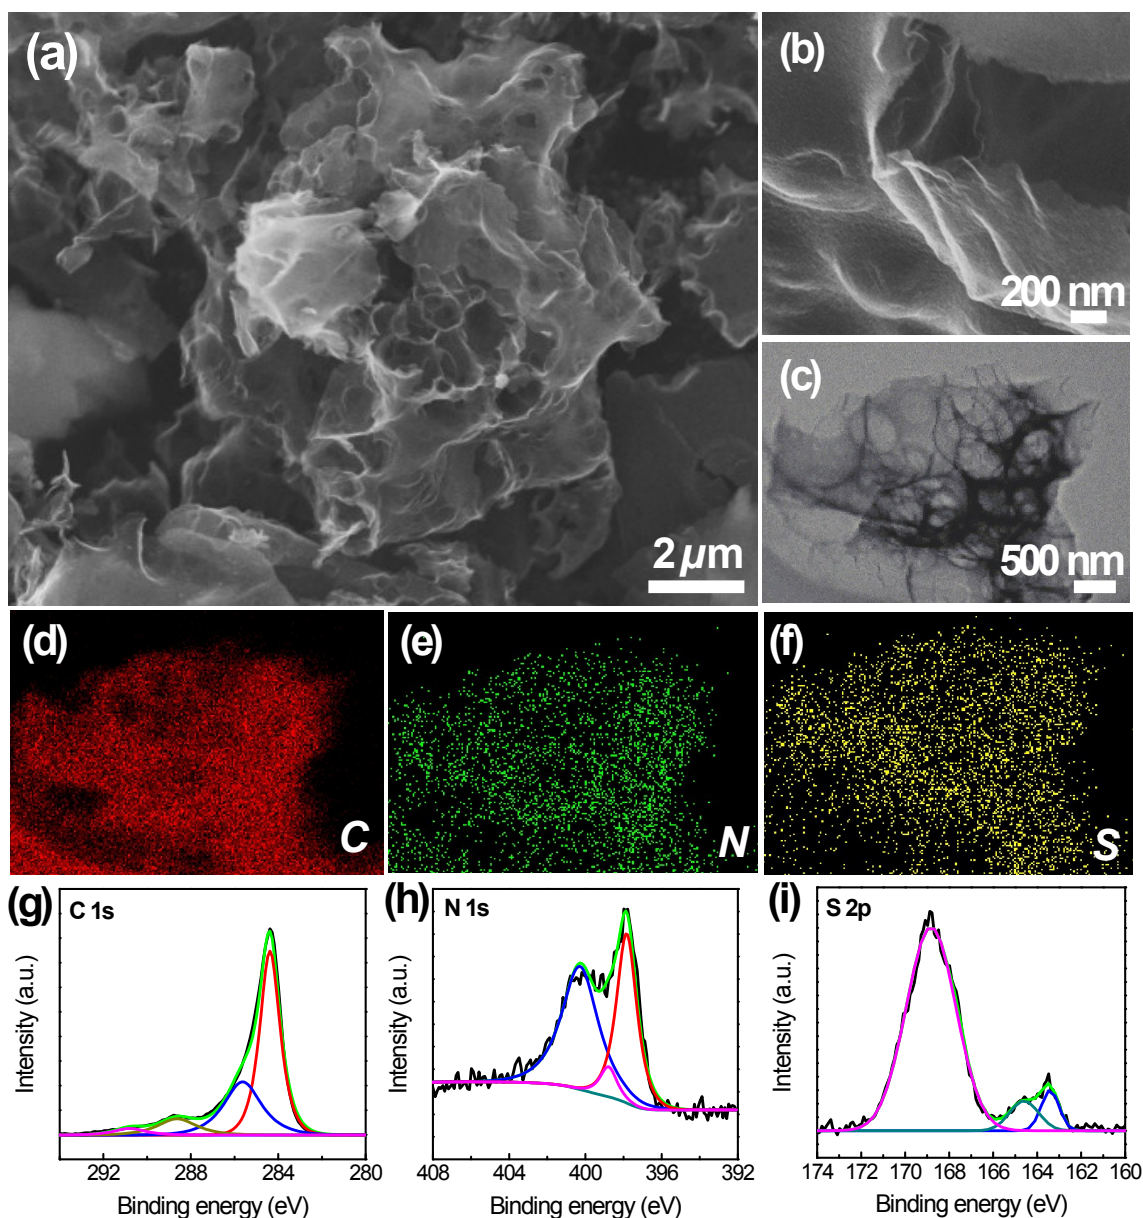

**Fig. S12** SEM (a, b) and TEM (c) images of NS-HPC synthesized by using melamine and H<sub>3</sub>BTB, and the corresponding EDX elemental mapping (d-f). High-resolution XPS spectra of C 1s (g), N 1s (h), and S 2p (i). Analysis of N 1s spectra reveals the presence of pyridinic N and quaternary N, ascribing to binding energies of 398.7 and 401.1 eV, respectively. As to the S 2p fine spectra, three different peaks at 168.7, 164.5, and 163.4 eV can be resolved. The prominent contribution at higher binding energy of 168.7 eV is attributable to the sulfate groups ( $-\text{C}-\text{SO}_x-\text{C}-$ ,  $x = 2-4$ ); the peak at 163.4 eV for S 2p<sub>3/2</sub> and the peak at 164.5 eV for S 2p<sub>1/2</sub> correspond to thiophene-S groups ( $-\text{C}-\text{S}-\text{C}-$ ).<sup>S7</sup> The atomic ratios of N and S based on XPS analysis are determined to be 3.76% and 4.24%, respectively.

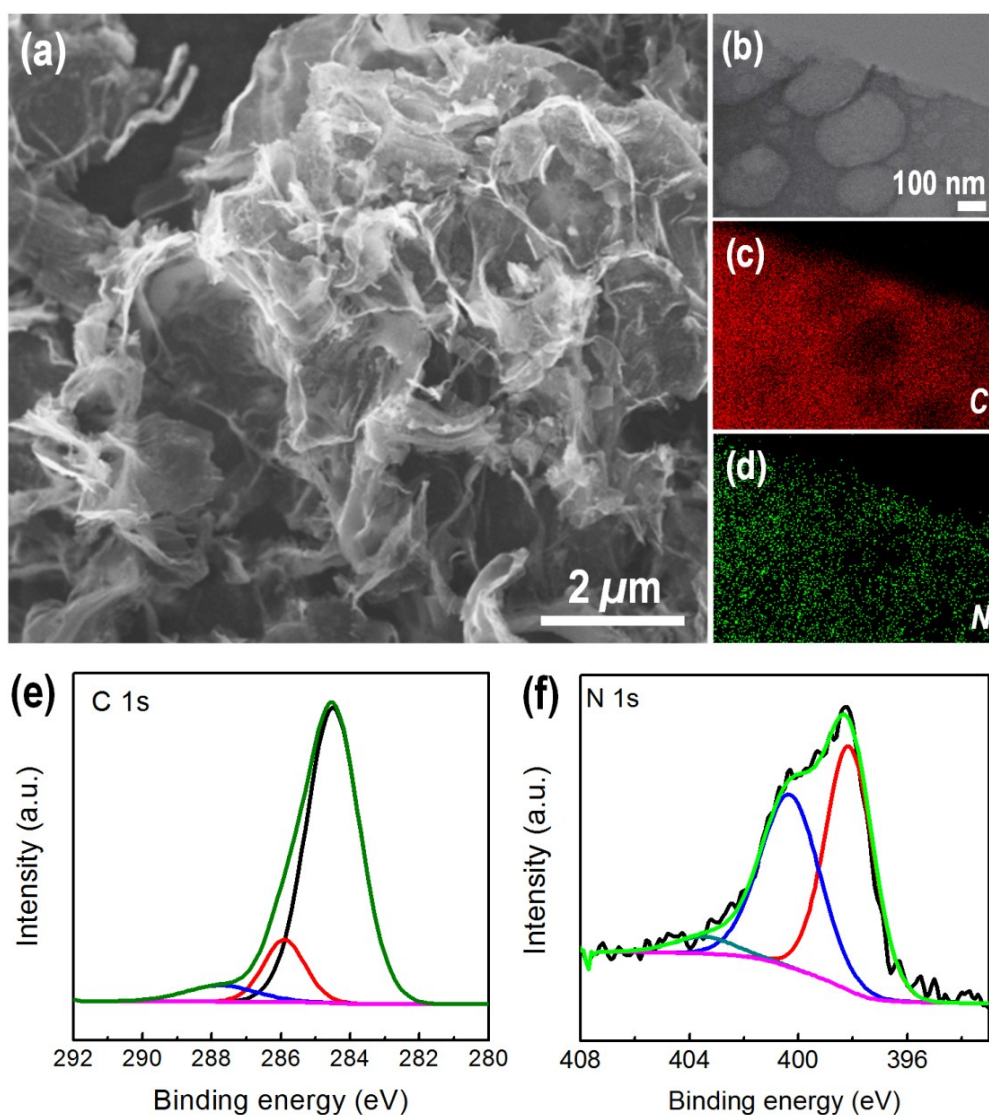

**Fig. S13** SEM (a) and TEM (b) images of N-HPC synthesized by using melamine and 1,5-NDA, and the corresponding EDX elemental mapping (c, d). High-resolution XPS spectra of C 1s (e) and N 1s (f). The N atomic content according to XPS characterization is determined to be 5.36%.



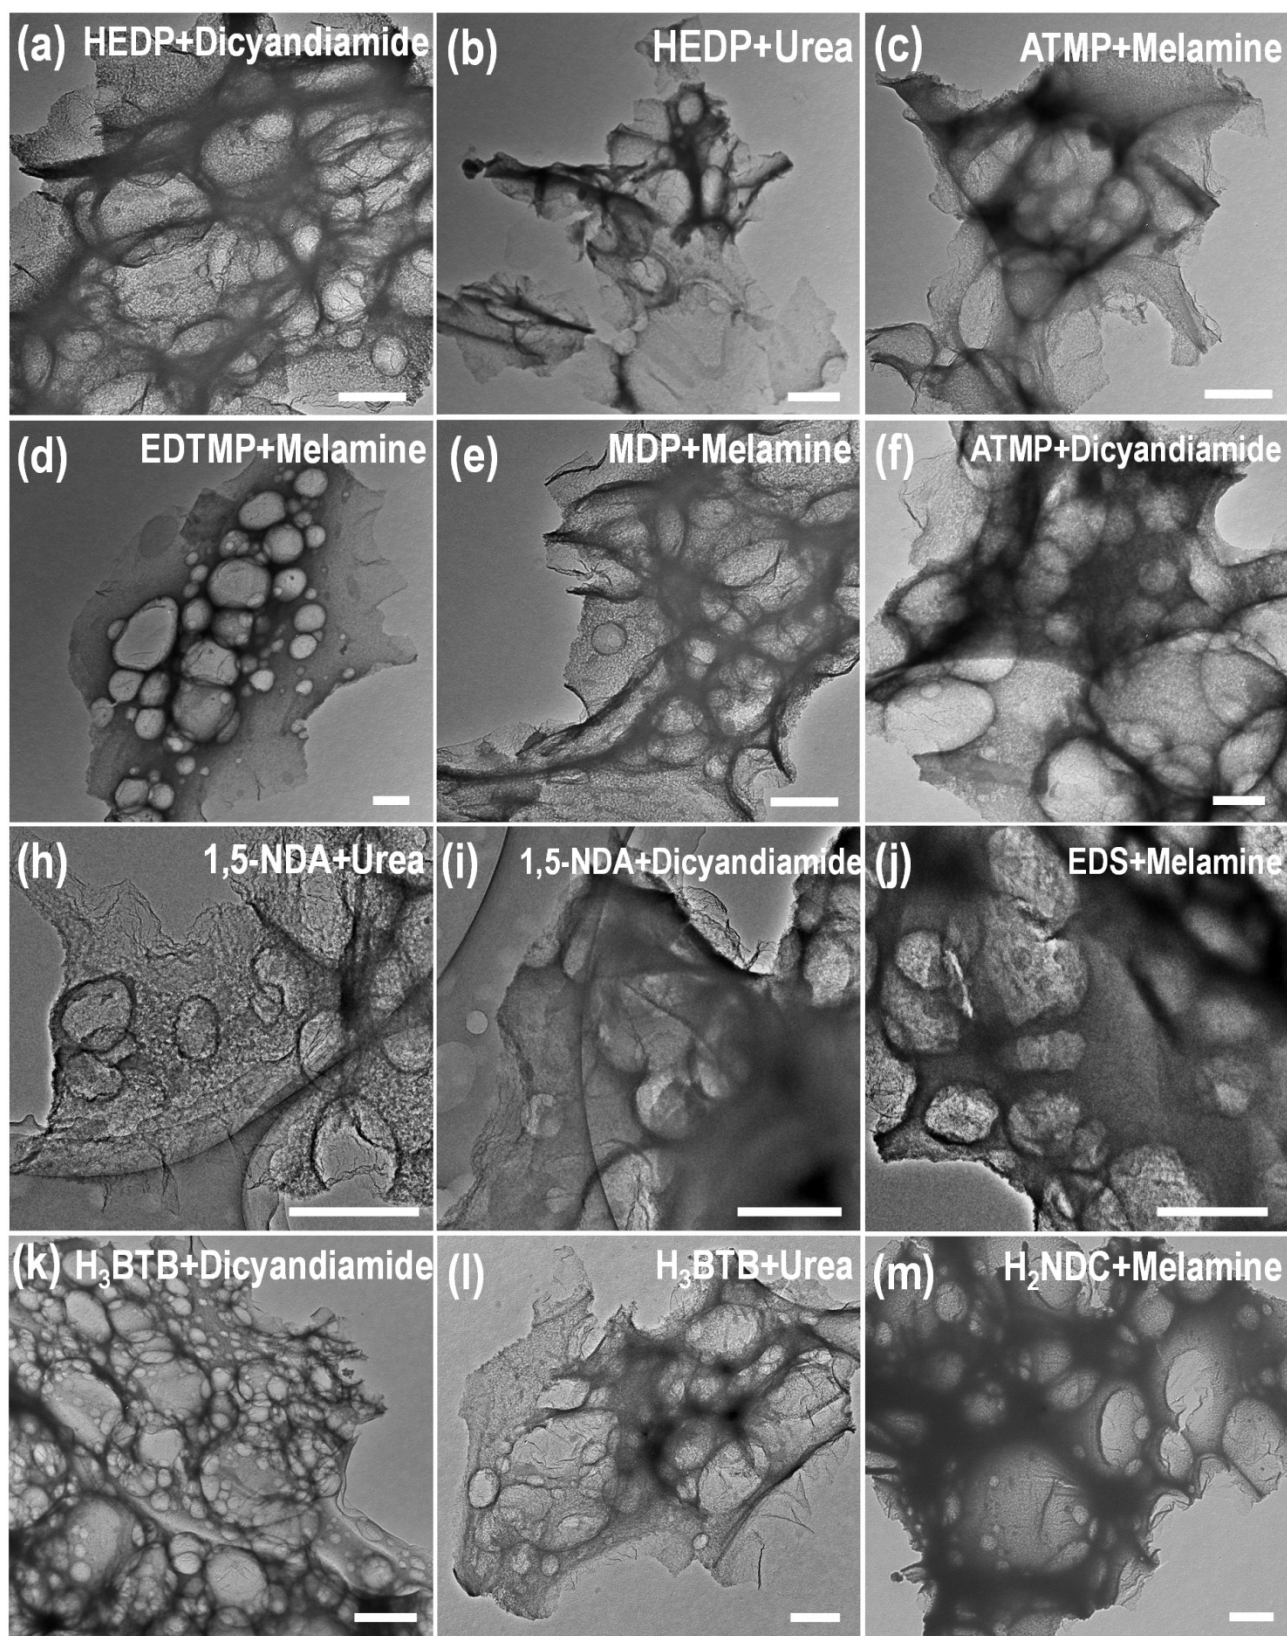

**Fig. S14** TEM images of porous carbon materials through the combination of different organic acids and bases. **Scale Bar: 500 nm.**

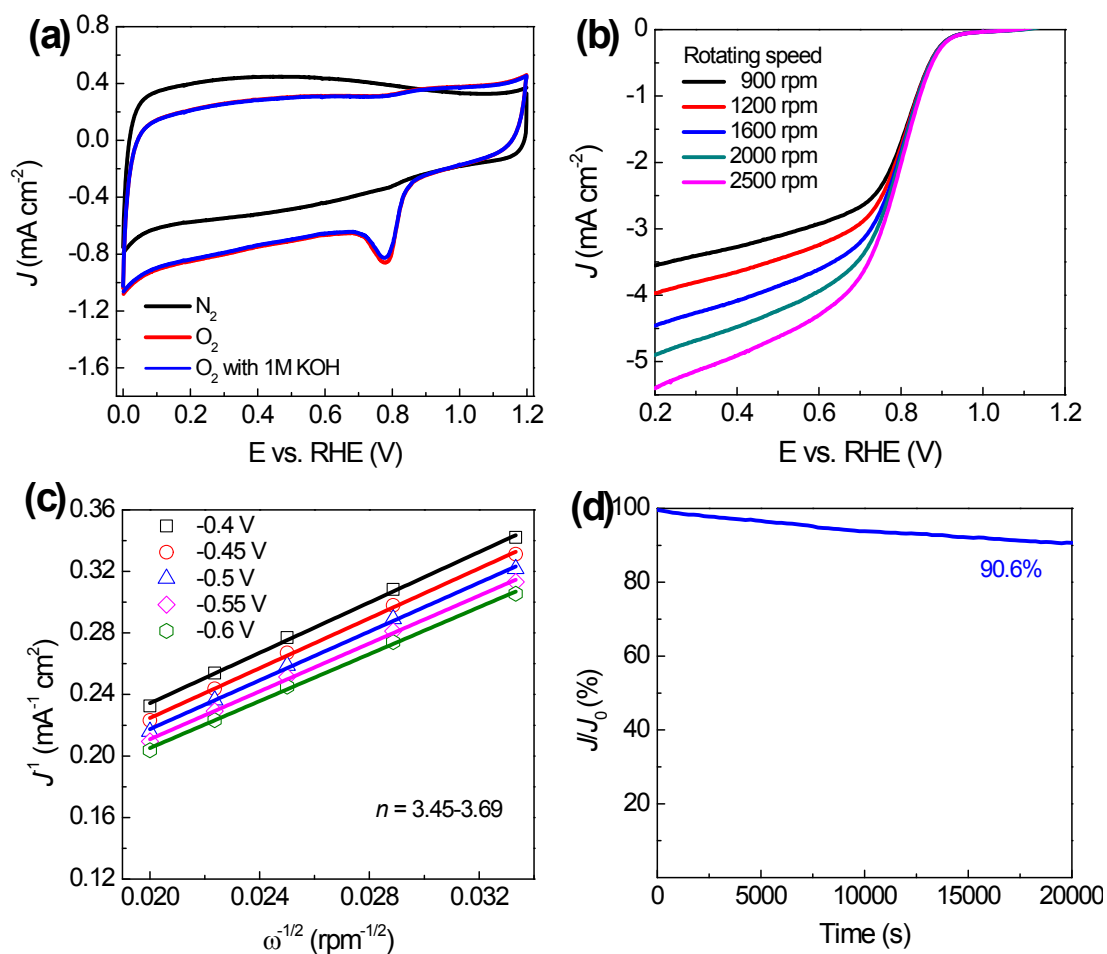

**Fig. S15** (a) CV curves of NS-HPC in N<sub>2</sub>-saturated 0.1 M KOH, O<sub>2</sub>-saturated 0.1 M KOH, and O<sub>2</sub>-saturated 1 M methanol solutions. Scan rate: 20 mV s<sup>-1</sup>. (b) Linear sweep voltammograms in O<sub>2</sub>-saturated 0.1 M KOH at a scan rate of 10 mV s<sup>-1</sup> at 1600 rpm. (c) K-L plots at different potentials. (d) The chronoamperometric response curve at 0.6 V.



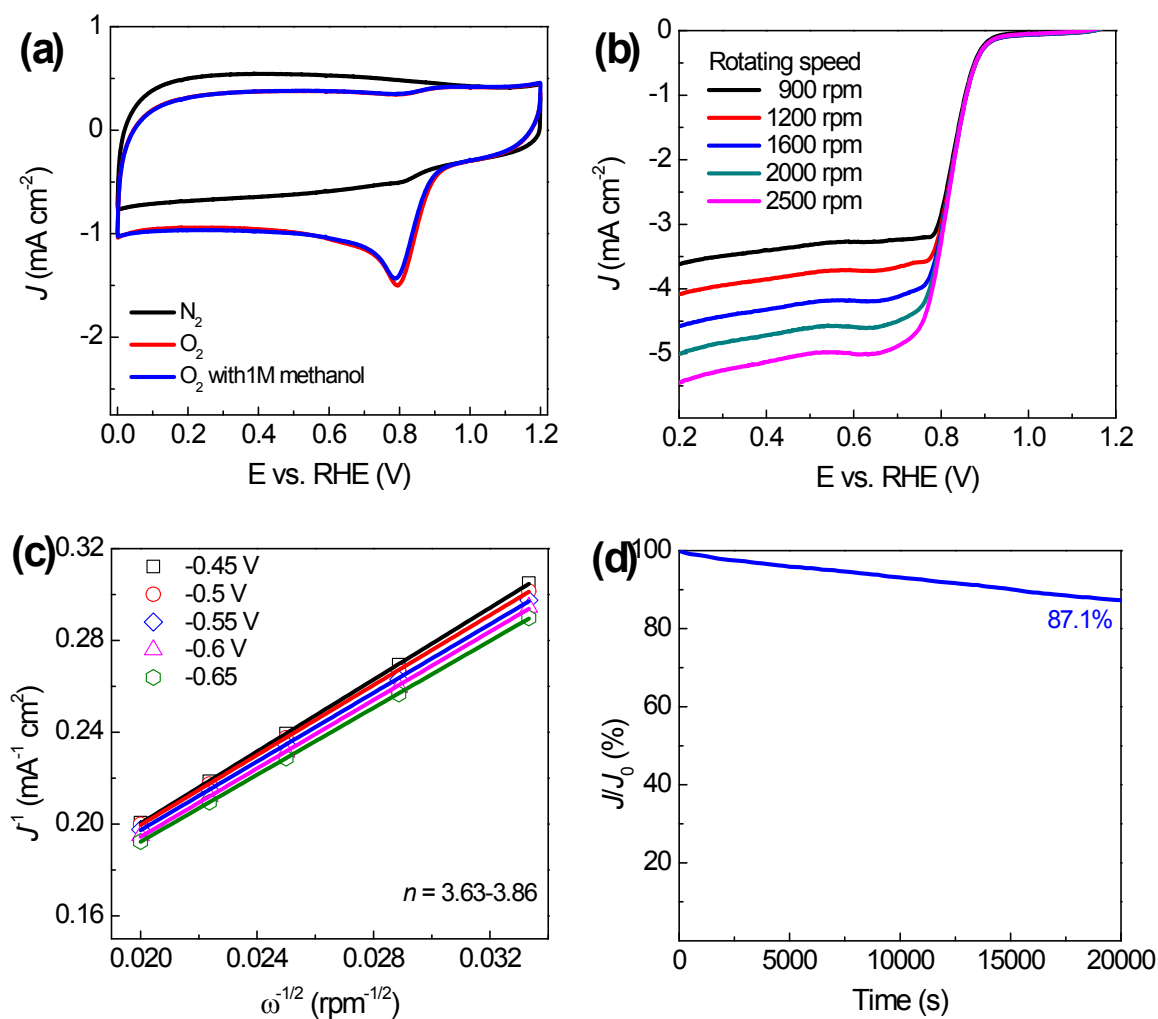

**Fig. S16** (a) CV curves of N-HPC in  $N_2$ -saturated 0.1 M KOH,  $O_2$ -saturated 0.1 M KOH, and  $O_2$ -saturated 1 M methanol solutions. Scan rate: 20 mV s<sup>-1</sup>. (b) Linear sweep voltammograms in  $O_2$ -saturated 0.1 M KOH at a scan rate of 10 mV s<sup>-1</sup> at 1600 rpm. (c) K-L plots at different potentials. (d) The chronoamperometric response curve at 0.6 V.

**Table S1.** Comparison of ORR catalytic performances between NP-HPC and previously reported chemically modified carbon materials in 0.1 M KOH.

| Catalyst                           | Surface area<br>(m <sup>2</sup> g <sup>-1</sup> ) | Onset potential<br>(V, vs. RHE) | ORR peak potential<br>(V, vs. RHE) | Catalyst loading<br>(mg cm <sup>-2</sup> ) | Half-wave potential<br>(V, vs. RHE) | Ref.             |
|------------------------------------|---------------------------------------------------|---------------------------------|------------------------------------|--------------------------------------------|-------------------------------------|------------------|
| <b>NP-HPC</b>                      | <b>1283</b>                                       | <b>0.949</b>                    | <b>0.822</b>                       | <b>0.204</b>                               | <b>0.83</b>                         | <b>This work</b> |
| Mesoporous N-doped carbons         | 1553                                              | 1.01                            | 0.781                              | 0.803                                      | N.A.                                | S8               |
| N,S,O-doped nanoporous carbons     | 1180                                              | -0.012                          | 0.753                              | 0.203                                      | 0.74                                | S9               |
| KOH activated N-doped carbons      | 2191                                              | 0.961                           | 0.805                              | 0.077                                      | 0.83                                | S10              |
| N,B-doped graphene                 | N.A.                                              | 1.03                            | 0.693                              | 0.283                                      | N.A.                                | S11              |
| P-doped ordered mesoporous carbons | 1182                                              | 0.863                           | 0.783                              | 0.79                                       | N.A.                                | S12              |
| N,O-doped mesoporous carbons       | 32.4                                              | 0.71                            | N.A.                               | 0.1                                        | N.A.                                | S13              |
| Hierarchical porous NPCs           | 756                                               | 0.943                           | 0.663                              | 0.102                                      | N.A.                                | S14              |
| ZIF derived N-doped carbons        | 519                                               | 0.915                           | 0.769                              | 0.2                                        | N.A.                                | S15              |
| N-doped graphene QDs               | N.A.                                              | 0.81                            | 0.703                              | 0.28                                       | N.A.                                | S16              |
| Graphene-based carbon nitride      | 542                                               | N.A.                            | 0.723                              | 0.071                                      | N.A.                                | S17              |
| P-doped graphene                   | N.A.                                              | 0.92                            | 0.561                              | 0.051                                      | N.A.                                | S18              |
| N-OMMC-G                           | 1121                                              | 0.923                           | 0.693                              | 0.41                                       | N.A.                                | S19              |
| N,S-doped carbon aerogels          | 225                                               | 0.843                           | 0.603                              | 0.28                                       | N.A.                                | S20              |
| CNT/HDC-1000                       | 3325                                              | N.A.                            | N.A.                               | N.A.                                       | 0.82                                | S21              |
| VA-NCNT film                       | N.A.                                              | N.A.                            | N.A.                               | N.A.                                       | 0.788                               | S22              |
| Hierarchally porous N-doped carbon | 1280                                              | N.A.                            | N.A.                               | 0.1                                        | 0.85                                | S23              |

## Supplementary References

- S1** S. H. Oh, R. Black, E. Pomerantseva, J. H. Lee, L. F. Nazar, *Nat. Chem.* **2012**, *4*, 1004–1010.
- S2** Y. Liang, Y. Li, H. Wang, J. Zhou, J. Wang, T. Regier, H. Dai, *Nat. Mater.* **2011**, *10*, 780–786.
- S3** T. Y. Ma, X. Z. Lin, Z. Y. Yuan, *Chem. Eur. J.* **2010**, *16*, 8487–8494.
- S4** H. Li, T. Y. Ma, D. M. Kong, Z. Y. Yuan, *Analyst* **2013**, *138*, 1084–1090.
- S5** Y. P. Zhu, M. Li, Y. L. Liu, T. Z. Ren, Z. Y. Yuan, *J. Phys. Chem. C* **2014**, *118*, 10963–10971.
- S6** J. Zhang, F. Guo, X. Wang, *Adv. Funct. Mater.* **2013**, *23*, 3008–3014.
- S7** X. Chen, X. Chen, X. Xu, Z. Yang, Z. Liu, L. Zhang, X. Xu, Y. Chen, S. Huang, *Nanoscale* **2014**, *6*, 13740–13747.
- S8** W. Yang, T. P. Fellinger, M. Antonietti, *J. Am. Chem. Soc.* **2011**, *133*, 206–209.
- S9** Y. Meng, D. Voiry, A. Goswami, X. Zou, X. Huang, M. Chhowalla, Z. Liu, T. Asefa, *J. Am. Chem. Soc.* **2014**, *136*, 13554–13557.
- S10** W. He, C. Jiang, J. Wang, L. Lu, *Angew. Chem. Int. Ed.* **2014**, *53*, 9503–9507.
- S11** Y. Zheng, Y. Jiao, L. Ge, M. Jaroniec, S. Z. Qiao, *Angew. Chem. Int. Ed.* **2013**, *52*, 3110–3116.
- S12** D. S. Yang, D. Bhattacharjya, S. Inamdar, J. Park and J. S. Yu, *J. Am. Chem. Soc.* **2012**, *134*, 16127–16120.
- S13** R. Silva, D. Voiry, M. Chhowalla and T. Asefa, *J. Am. Chem. Soc.*, **2013**, *135*, 7823–7826.
- S14** H. Jiang, Y. Zhu, Q. Feng, Y. Su, X. Yang and C. Li, *Chem. Eur. J.* **2014**, *20*, 3106–3112.
- S15** H. X. Zhong, J. Wang, Y. W. Zhang, W. L. Xu, W. Xing, D. Xu, Y. F. Zhang and X. B. Zhang, *Angew. Chem. Int. Ed.* **2014**, *53*, 14235–14239.
- S16** Y. Li, Y. Zhao, H. Cheng, Y. Hu, G. Shi, L. Dai and L. Qu, *J. Am. Chem. Soc.* **2012**, *134*, 15–18.
- S17** S. Yang, X. Feng, X. Wang, and K. Müllen, *Angew. Chem. Int. Ed.* **2011**, *50*, 5339–5343.
- S18** C. Zhang, N. Mahmood, H. Yin, F. Liu and Y. Hou, *Adv. Mater.* **2013**, *25*, 4932–4937.
- S19** J. Liang, X. Du, C. Gibson, X. W. Du and S. Z. Qiao, *Adv. Mater.* **2013**, *25*, 6226–6231.
- S20** S. A. Wohlgemuth, R. J. White, M. G. Willinger, M. M. Titiricia and M. Antonietti, *Green Chem.* **2012**, *14*, 1515–1523.
- S21** Y. J. Sa, C. Park, H. Y. Jeong, S. H. Park, Z. Lee, K. T. Kim, G. G. Park and S. H. Joo, *Angew. Chem., Int. Ed.* **2014**, *53*, 4102–4106.
- S22** K. Gong, F. Du, Z. Xia, M. Durstock, L. Dai, *Science* **2009**, *323*, 760–764.
- S23** H. W. Liang, X. Zhuang, S. Brüller, X. Feng and K. Müllen, *Nat. Commun.* **2014**, *5*, 4973.
